# Supplementary material for: Lymphocyte activation gene 3 (LAG3) protein expression on tumor-infiltrating lymphocytes in aggressive and TP53-mutated salivary gland carcinomas
Source: Springer Nature journal article supplement (doi:10.1007/s00262-020-02551-6), 2020-03-30
Supplement: MOESM1 [file 17844130]

|                      |               | LAG3 score |           |           |                                | CD8 score   |               |              |                          |
|----------------------|---------------|------------|-----------|-----------|--------------------------------|-------------|---------------|--------------|--------------------------|
|                      |               | < 1% TILs  | 1-2% TILs | ≥ 3% TILs | p                              | < 10 / spot | 10-100 / spot | > 100 / spot | p                        |
| <b>TP53 mutation</b> | wildtype      | 55 (82.1)  | 6 (9)     | 6 (9)     | <b>&lt; 0.001</b><br>(n = 98)  | 18 (25.7)   | 37 (52.9)     | 15 (21.4)    | <b>n.s.</b><br>(n = 101) |
|                      | nulltype      | 4 (33.3)   | 6 (50)    | 2 (16.7)  |                                | 2 (16.7)    | 4 (33.3)      | 6 (50)       |                          |
|                      | overexp.      | 11 (57.9)  | 1 (5.3)   | 7 (36.8)  |                                | 3 (15.8)    | 11 (57.9)     | 5 (26.3)     |                          |
| <b>CD8</b>           | < 10 / spot   | 24 (92.3)  | 2 (7)     | 0 (0)     | <b>&lt; 0.001</b><br>(n = 103) |             |               |              |                          |
|                      | 10-100 / spot | 37 (74)    | 9 (18)    | 4 (8)     |                                |             |               |              |                          |
|                      | > 100 / spot  | 13 (48.1)  | 3 (11)    | 11 (40.7) |                                |             |               |              |                          |
| <b>Total</b>         |               | 74 (71.8)  | 14 (13.6) | 15 (14.6) |                                | 26 (24.5)   | 53 (50)       | 27 (25.5)    |                          |

**Supplementary table 1: Interdependencies of LAG3, CD8 and TP53 mutation types.** LAG3 and CD8 expression displayed in three categories. Subgroup row percentages in parentheses.
